# Supplementary material for: GM-CSF Programs Hematopoietic Stem and Progenitor Cells During Candida albicans Vaccination for Protection Against Reinfection
Source: PubMed Central journal article supplement (PMC8715000; doi:10.3389/fimmu.2021.790309), 2021-12-15
Supplement: DataSheet_1.pdf [file DataSheet_1.pdf]

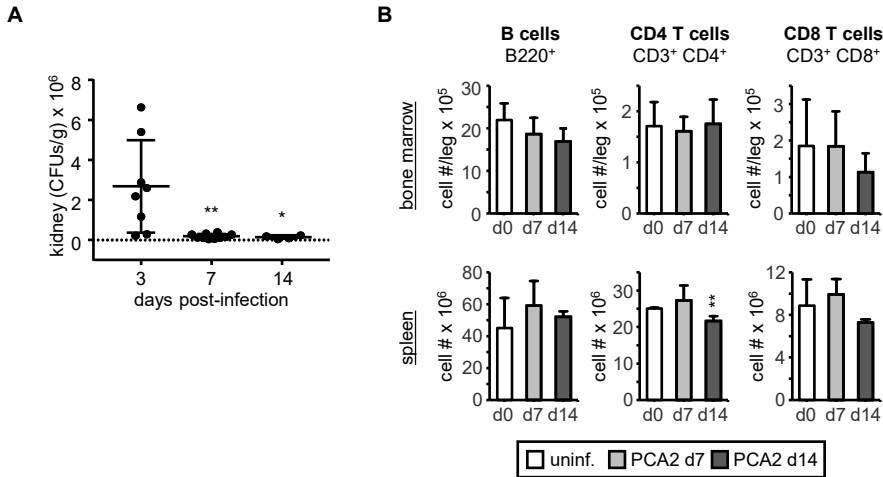

**Supplementary Figure 1. Fungal burden and lymphoid cell numbers during PCA2 infection. (related to Figure 1)**

(A) Fungal burden in the kidneys expressed as CFUs per gram of tissue (n = 8-12) during the PCA2 infection at the indicated time points. (B) B cell and CD4 and CD8 T cell numbers in bone marrow and spleen assessed by flow cytometry at the indicated time points post-PCA2 infection. Data are presented as mean plus SD of 3-5 mice. Statistical significance was assessed by Student's t test (\* $P < 0.05$  and \*\* $P < 0.01$ ).

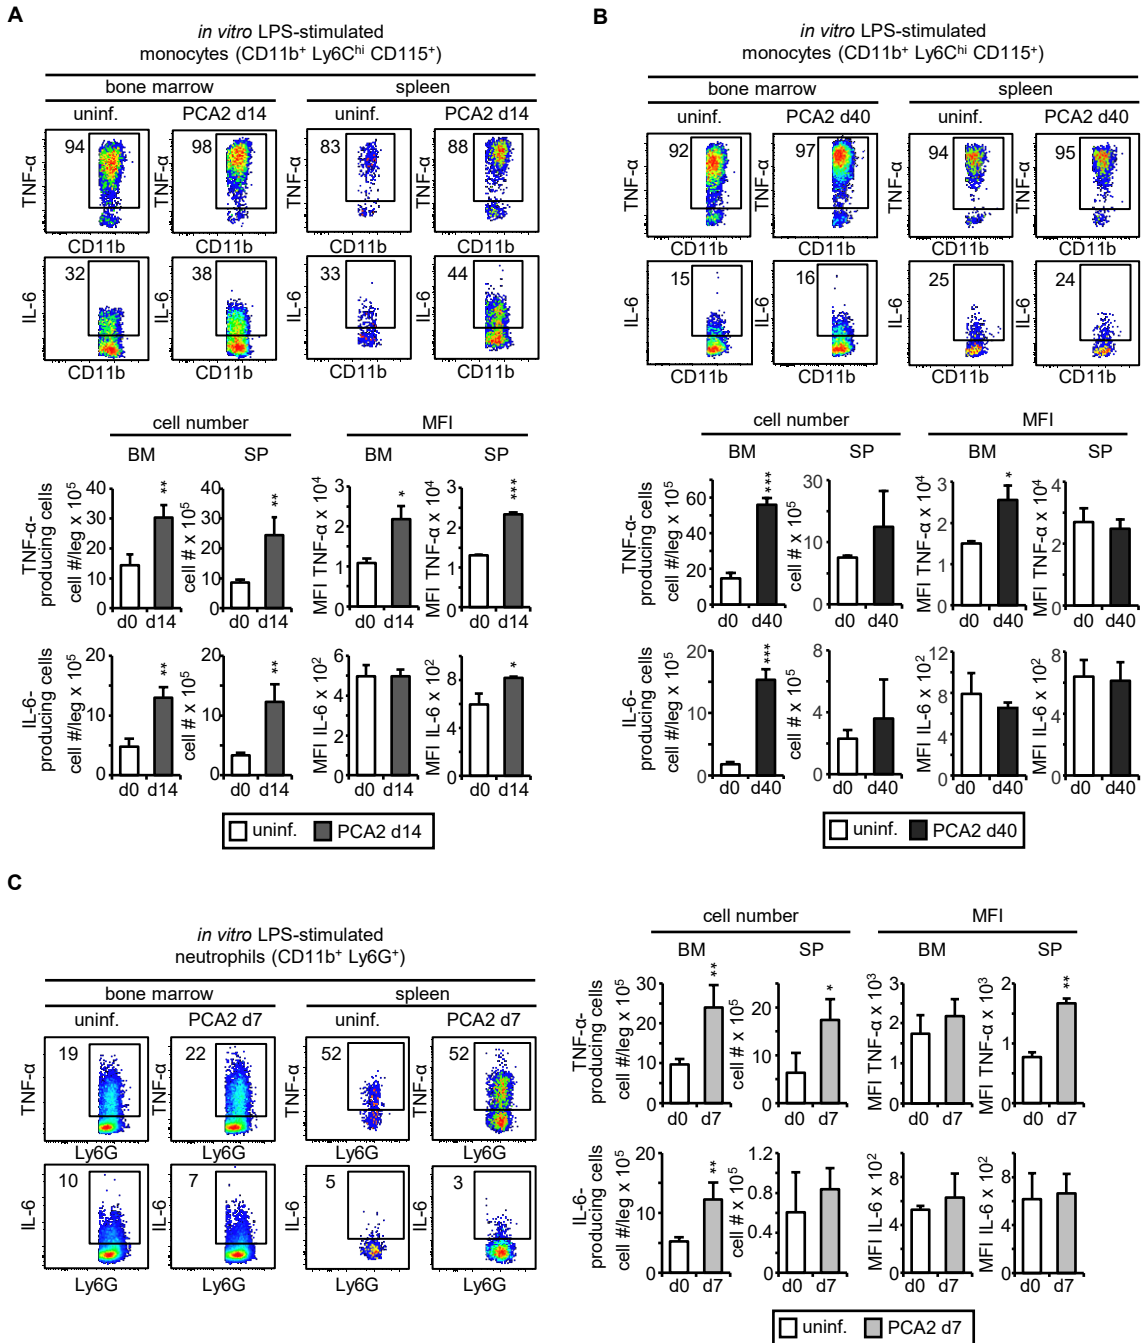

**Supplementary Figure 2. Cytokine production by monocytes and neutrophils after PCA2 infection. (related to Figure 2)** Intracellular detection by flow cytometry of TNF- $\alpha$  and IL-6 in pre-gated monocytes (A-B) or neutrophils (C) after stimulation of total RBC-lysed bone marrow cell or splenocyte cultures with LPS for 6h with brefeldin A for the final 4 h. Dot plots indicating the % of cytokine-producing cells are shown, as well as the total cell numbers and the MFI of cytokine-producing cells in the bone marrow and spleens from 7- (C), 14- (A) or 40- (B) day PCA2-infected mice and uninfected mice. Data are presented as mean plus SD of 3 mice, and statistical significance was assessed by Student's t test (\* $P < 0.05$ , \*\* $P < 0.01$ , and \*\*\* $P < 0.001$ ).

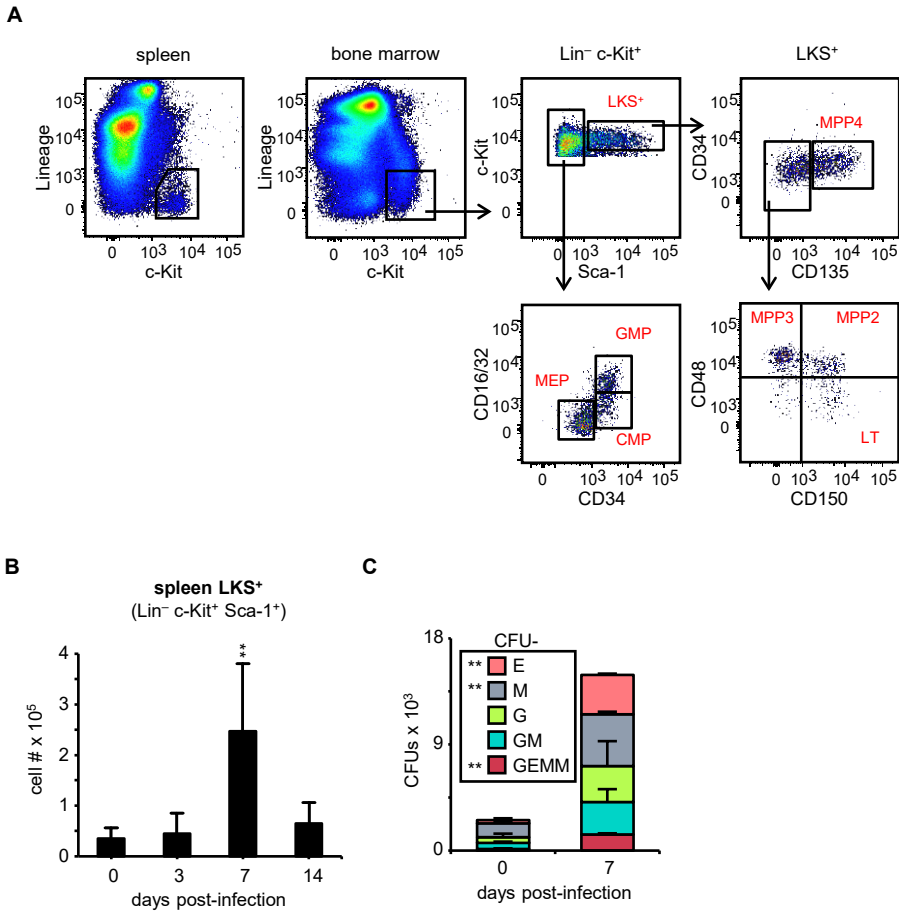

**Supplementary Figure 3. Characterization of HSPC subsets during the PCA2 infection. (related to Figure 3)**

(A) Example of flow cytometry gating of bone marrow or splenic cells for progenitor identification. (B) LKS<sup>+</sup> cell numbers in the spleen assessed by flow cytometry at the indicated time points post-PCA2 infection. (C)  $0.7 \times 10^6$  splenocytes per well were plated in methylcellulose media and colonies were counted after 1 week of culture. E – erythrocyte, M – monocyte, G – granulocyte, GM – granulocyte + monocyte, GEMM – granulocyte + erythrocyte + monocyte + megakaryocyte. Data are presented as mean plus SD of 3-5 mice, and statistical significance was assessed by Student's t test (\*\* $P < 0.01$ ).

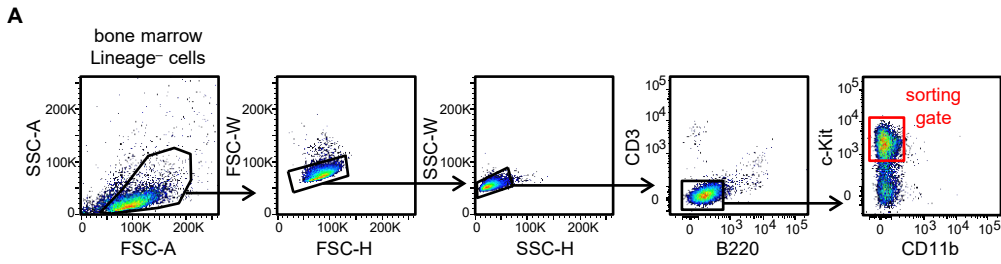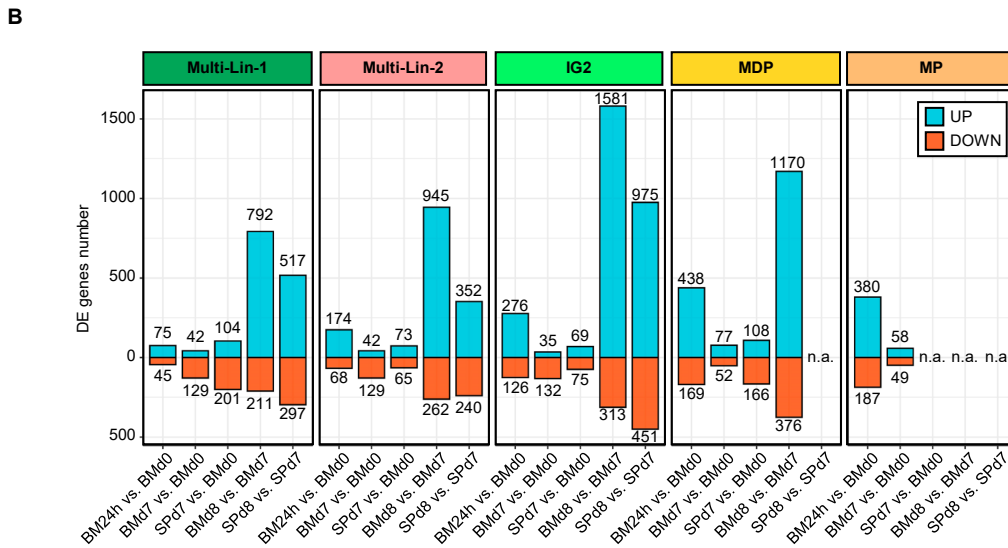

**Supplementary Figure 4. Isolation of HSPCs for single cell RNA sequencing. (related to Figure 5)**

(A) Example of flow cytometry gating for sorting bone marrow Lin<sup>-</sup> c-Kit<sup>+</sup> cells. (B) Differentially expressed gene number upregulated (UP) and downregulated (DOWN) in the indicated comparisons in the cellHarmony-identified HSPC subpopulations with monocyte potential. n.a., not analyzed.

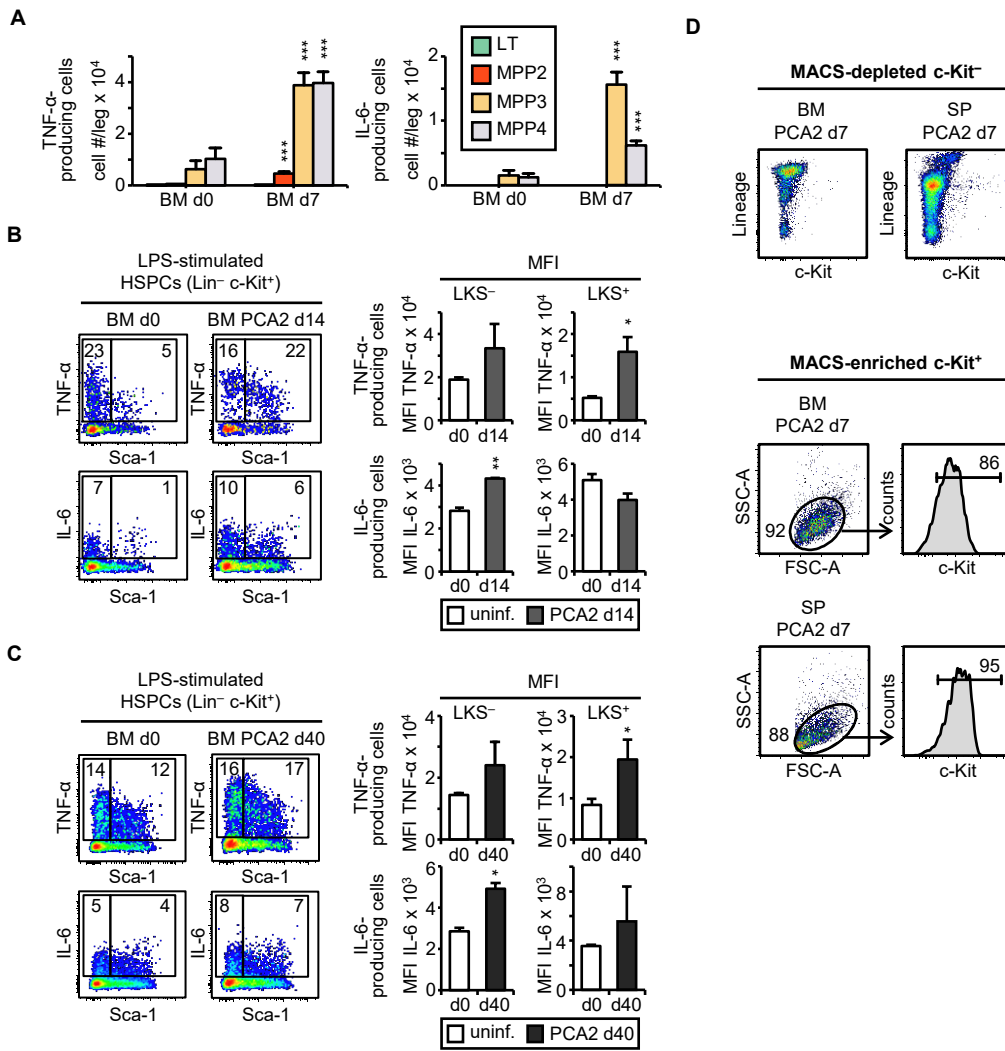

**Supplementary Figure 5. Cytokine production by HSPCs after the PCA2 infection. (related to Figure 6)**

(A-C) Intracellular detection by flow cytometry of TNF- $\alpha$  and IL-6 in pre-gated Lin<sup>-</sup> c-Kit<sup>+</sup> cells from total RBC-lysed bone marrow cell cultures isolated from 7- (A), 14- (B) or 40- (C) day PCA2-infected or uninfected mice and stimulated with LPS for 6 h with brefeldin A for the final 4 h. (A) Cytokine-producing MPP cell subsets were identified (see figure S3A for gating strategy). (B-C) Dot plots indicating the % of cytokine-producing LKS<sup>+</sup> and LKS<sup>-</sup> cells are shown, as well as the MFI of cytokine-producing LKS<sup>+</sup> and LKS<sup>-</sup> cells in the bone marrow. Data are presented as mean plus SD of 3-4 mice, and statistical significance was assessed by Student's t test (\* $P < 0.05$ , \*\* $P < 0.01$  and \*\*\* $P < 0.001$ ). (D) Purity of MACS-depleted c-Kit<sup>-</sup> or MACS-enriched c-Kit<sup>+</sup> cells from the bone marrow or the spleen of 7-day PCA2-infected mice for adoptive transfer experiments.

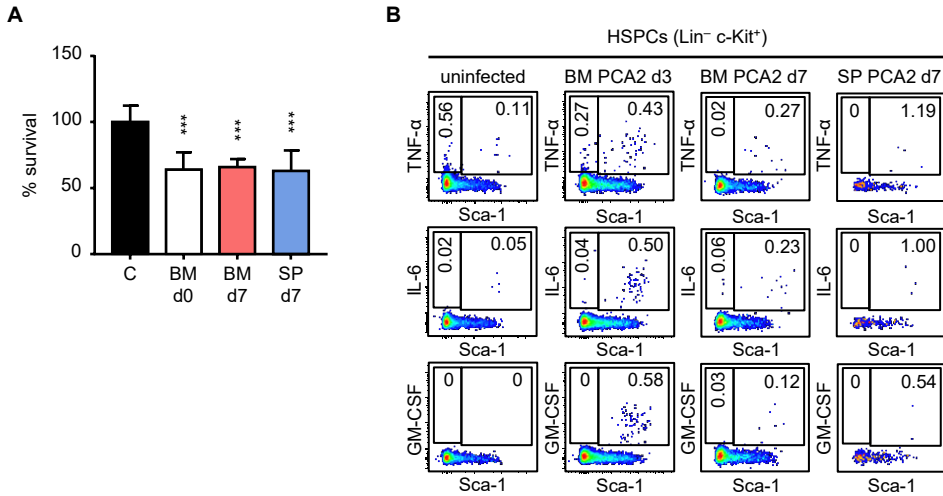

**Supplementary Figure 6. Fungicidal activity of *ex vivo* differentiated macrophages and GM-CSF-producing HSPCs Cells during the PCA2 infection. (related to Figure 7)**

(A) Lin<sup>-</sup> cells were isolated from the bone marrow or spleen of uninfected mice or 7-day PCA2-infected mice and *ex vivo* differentiated into macrophages with M-CSF for 7 days. For fungicidal activity determination, macrophages were plated at a density of 200,000 cells in 150  $\mu$ l of complete cell culture medium and challenged with viable PCA2 yeasts at a 1:3 ratio (murine cell:yeast) for 1 h. *C. albicans* cells were also inoculated in culture medium without murine cells (C, control). After incubation, samples were diluted, plated on Sabouraud dextrose agar and incubated overnight at 37°C; CFUs were counted and killing percentages were determined as follows: % killing = [1 - (CFUs sample at t = 1 h)/(CFUs control at t = 1 h)]  $\times$  100. Triplicate samples were analyzed in each assay. Data are presented as mean plus SD of 3-5 mice, and statistical significance was assessed by Student's t test (\*\*\*)  $P < 0.001$ . (B) Intracellular detection by flow cytometry of TNF- $\alpha$ , IL-6 and GM-CSF in pre-gated Lin<sup>-</sup> c-Kit<sup>+</sup> cells from total RBC-lysed bone marrow cell or splenocyte cultures isolated from 7-day PCA2-infected or uninfected mice and stimulated with PMA/ionomycin and brefeldin A for 6 h. Dot plots indicating the % of cytokine-producing LKS<sup>+</sup> and LKS<sup>-</sup> cells are shown.
